## Editorial Notice

Cooperative Research Report No. 1. North-Western Working Group. 31 pp.  
April 1962. Danish Kr. 7.

Attention is drawn to a new series in the Council's publications. The Cooperative Research Report series is intended to give a rapid and reasonably priced means of publishing the reports prepared by the various working groups set up under the different committees of the Council to investigate particular problems.

It is suggested that the Report series are referred to as follows: in the text as ICES followed by the year of publication in parenthesis, and in the reference list as

ICES, 1962. "North-Western Working Group". Coop.Res.Rep., No. 1: 31 pp.

*F. R. H. J.*
